# Supplementary material for: Untangling the Extracellular Matrix of Idiopathic Epiretinal Membrane: A Path Winding among Structure, Interactomics and Translational Medicine
Source: MDPI journal article supplement (doi:10.3390/cells11162531), 2022-08-15
Supplement: s1 [file s1]

## Supplementary Table and Figures

**Table S1:** In order to facilitate net understanding, symbols used to represent the 141 experimental selected proteins in the generated nets are listed (column A) near the MetaCore protein names (column B). We also report the corresponding UniProtKB recommended protein names (column C) and identifiers (column D) of the corresponding UniProtKB entries. Column E provides the main compartmental localization of the listed proteins. Edge green-numbers (column F) indicate, for each row-protein, how many interactions are established by our list-proteins with other DIN hubs. Edge red-numbers (column G) specify, for each row-protein, the number of interactions selected iERM-proteins establish within the SPN.

| Net symbol                                                                          | MetaCore Name       | UniProtKB Name                                         | UniProtKB ID | Main Localizations   | Edges |    |
|-------------------------------------------------------------------------------------|---------------------|--------------------------------------------------------|--------------|----------------------|-------|----|
|    | 90K                 | galectin 3 binding protein                             | LG3BP_HUMAN  | membrane             | 1     | 16 |
|    | A1M                 | protein AMBP (clived in: Alpha-1-microglobulin, Inter- | AMBP_HUMAN   | membrane             | 0     | 14 |
|    | A2M                 | alpha-2-macroglobulin                                  | A2MG_HUMAN   | extracellular region | 5     | 34 |
|    | AGP1 (ORM1)         | alpha-1-acid glycoprotein 1 (orosomuroid 1)            | A1AG1_HUMAN  | extracellular region | 0     | 11 |
|    | Agrin               | agrin                                                  | AGRIN_HUMAN  | membrane             | 1     | 12 |
|    | Alpha 1-antitrypsin | alpha-1-antitrypsin (serpin A1)                        | A1AT_HUMAN   | extracellular region | 0     | 47 |
|    | Annexin I           | annexin A1                                             | ANXA1_HUMAN  | cytoplasm            | 4     | 26 |
|    | Annexin II          | annexin A2                                             | ANXA2_HUMAN  | membrane             | 4     | 43 |
|    | Annexin V           | annexin A5                                             | ANXA5_HUMAN  | cytoplasm            | 0     | 8  |
|    | Annexin VI          | annexin A6                                             | ANXA6_HUMAN  | cytoplasm            | 3     | 20 |
|   | Annexin VII         | annexin A7                                             | ANXA7_HUMAN  | cytoplasm            | 1     | 11 |
|  | Annexin XI          | annexin A11                                            | ANX11_HUMAN  | cytoplasm            | 1     | 15 |
|  | Antithrombin III    | antithrombin-III                                       | ANT3_HUMAN   | extracellular region | 0     | 14 |
|  | APCS                | serum amyloid P-component                              | SAMP_HUMAN   | extracellular region | 0     | 5  |
|  | APOA1               | apolipoprotein A1                                      | APOA1_HUMAN  | extracellular region | 1     | 30 |
|  | APOE                | apolipoprotein E                                       | APOE_HUMAN   | extracellular region | 1     | 28 |
|  | ARG1                | arginase-1                                             | ARG1_HUMAN   | cytoplasm            | 0     | 23 |
|  | AZGP1               | zinc-alpha-2-glycoprotein                              | ZA2G_HUMAN   | extracellular region | 1     | 8  |
|  | BCAM                | basal cell adhesion molecule                           | BCAM_HUMAN   | membrane             | 1     | 7  |
|  | BETA-IG-H3          | transforming growth factor-beta-induced protein ig-h3  | BGH3_HUMAN   | extracellular region | 2     | 21 |
|  | Biglycan            | biglycan                                               | PGS1_HUMAN   | cytoplasm            | 2     | 15 |
|  | C1QTNF5             | complement C1q tumor necrosis factor-related protein   | C1QT5_HUMAN  | cytoplasm            | 0     | 5  |
|  | Calgranulin A       | protein S100-A8 (calgranulin-A)                        | S10A8_HUMAN  | cytoplasm            | 3     | 19 |
|  | Calgranulin B       | protein S100-A9 (calgranulin-B)                        | S10A9_HUMAN  | extracellular region | 6     | 29 |
|  | Carboxypeptidase A6 | carboxypeptidase A6                                    | CBPA6_HUMAN  | membrane             | 0     | 8  |
|  | Cathepsin B         | cathepsin B                                            | CATD_HUMAN   | cytoplasm            | 14    | 51 |
|  | Cathepsin D         | cathepsin D                                            | CATB_HUMAN   | cytoplasm            | 8     | 41 |
|  | Cathepsin H         | pro-cathepsin H                                        | CATH_HUMAN   | cytoplasm            | 3     | 9  |
|  | Cathepsin V         | cathepsin L2                                           | CATL2_HUMAN  | cytoplasm            | 2     | 19 |
|  | CD147               | basigin                                                | BASI_HUMAN   | cytoplasm            | 6     | 8  |
|  | CD44                | CD44 antigen                                           | CD44_HUMAN   | membrane             | 7     | 94 |

|   |                  |                                                                                               |             |                      |    |     |
|---|------------------|-----------------------------------------------------------------------------------------------|-------------|----------------------|----|-----|
| ? | CHADL            | chondroadherin-like protein                                                                   | CHADL_HUMAN | cytoplasm            | 0  | 0   |
| ? | Clusterin        | clusterin                                                                                     | CLUS_HUMAN  | extracellular region | 2  | 37  |
| T | COL18A1          | collagen alpha-1(XVIII) chain                                                                 | CO1A1_HUMAN | extracellular region | 2  | 31  |
| ? | COL4A1           | collagen alpha-1(IV) chain                                                                    | CO4A1_HUMAN | extracellular region | 1  | 13  |
| ? | COL4A2           | collagen alpha-2(IV) chain                                                                    | CO4A2_HUMAN | extracellular region | 0  | 15  |
| ? | COL4A3           | collagen alpha-3(IV) chain                                                                    | CO4A3_HUMAN | extracellular region | 1  | 7   |
| ? | COL4A4           | collagen alpha-4(IV) chain                                                                    | CO4A4_HUMAN | extracellular region | 0  | 1   |
| ? | COL4A5           | Collagen alpha-5(IV) chain                                                                    | CO4A5_HUMAN | extracellular region | 0  | 1   |
| ? | COL9A2           | collagen alpha-2(IX) chain                                                                    | CO9A2_HUMAN | extracellular region | 0  | 5   |
| ? | Collagen II      | collagen alpha-1(II) chain                                                                    | CO2A1_HUMAN | extracellular region | 2  | 35  |
| ? | Collagen XII     | collagen alpha-1(XII) chain                                                                   | COCA1_HUMAN | extracellular region | 0  | 11  |
| ? | Collagen XIV     | collagen alpha-1(XIV) chain                                                                   | COEA1_HUMAN | extracellular region | 1  | 7   |
| ? | CPA4             | carboxypeptidase A4                                                                           | CBPA4_HUMAN | membrane             | 0  | 2   |
| ? | Cystatin A       | cystatin-A                                                                                    | CYTA_HUMAN  | cytoplasm            | 4  | 11  |
| ? | Cystatin B       | cystatin-B                                                                                    | CYTB_HUMAN  | cytoplasm            | 1  | 15  |
| ? | Cystatin C       | cystatin-C                                                                                    | CYTC_HUMAN  | cytoplasm            | 3  | 20  |
| ? | Cystatin SA      | cystatin-SA                                                                                   | CYTT_HUMAN  | cytoplasm            | 0  | 2   |
| ? | Cystatin SN      | cystatin-SN                                                                                   | CYTN_HUMAN  | cytoplasm            | 0  | 2   |
| ? | DMBT1            | deleted in malignant brain tumors 1 protein                                                   | DMBT1_HUMAN | membrane             | 0  | 4   |
| Y | Dystroglycan     | dystroglycan 1                                                                                | DAG1_HUMAN  | membrane             | 0  | 14  |
| X | ECM1             | extracellular matrix protein 1                                                                | ECM1_HUMAN  | extracellular region | 0  | 15  |
| Y | EGFR             | epidermal growth factor receptor                                                              | EGFR_HUMAN  | membrane             | 12 | 137 |
| T | EMILIN-1         | EMILIN-1                                                                                      | EMIL1_HUMAN | extracellular region | 0  | 12  |
| ? | Endoplasmin      | endoplasmin                                                                                   | ENPL_HUMAN  | cytoplasm            | 2  | 34  |
| ? | EPDR1            | mammalian ependymin-related protein 1                                                         | EPDR1_HUMAN | extracellular region | 0  | 8   |
| ? | ERp72            | protein disulfide-isomerase A4                                                                | PDIA4_HUMAN | cytoplasm            | 0  | 6   |
| ? | F-spondin        | Spondin-1 (Vascular smooth muscle cell growth-promo                                           | SPON1_HUMAN | cytoplasm            | 0  | 9   |
| ? | Fascin           | fascin                                                                                        | FSCN1_HUMAN | membrane             | 1  | 22  |
| T | Fibrillin 1      | fibrillin-1                                                                                   | FBN1_HUMAN  | extracellular region | 2  | 20  |
| ? | Fibrinogen alpha | fibrinogen alpha chain                                                                        | FIBA_HUMAN  | extracellular region | 0  | 17  |
| ? | Fibrinogen beta  | fibrinogen beta chain                                                                         | FIBB_HUMAN  | extracellular region | 0  | 13  |
| ? | Fibrinogen gamma | fibrinogen gamma chain                                                                        | FIBG_HUMAN  | extracellular region | 0  | 17  |
| T | Fibronectin      | fibronectin                                                                                   | FINC_HUMAN  | extracellular region | 8  | 82  |
| T | Fibulin-3        | EGF-containing fibulin-like extracellular matrix protein                                      | FBLN3_HUMAN | extracellular region | 0  | 13  |
| ? | FLJ22662         | phospholipase B-like 1                                                                        | PLBL1_HUMAN | cytoplasm            | 0  | 8   |
| T | Galectin-1       | galectin-1                                                                                    | LEG1_HUMAN  | extracellular region | 3  | 24  |
| ? | Galectin-3       | galectin-3                                                                                    | LEG3_HUMAN  | cytoplasm            | 6  | 42  |
| ? | Gelsolin         | gelsolin                                                                                      | GELS_HUMAN  | cytoplasm            | 1  | 23  |
| X | Hemopexin        | hemopexin                                                                                     | HEMO_HUMAN  | extracellular region | 1  | 6   |
| ? | HMGB1            | high mobility group protein B1                                                                | HMGB1_HUMAN | nucleus              | 1  | 61  |
| ? | HSP20            | heat shock protein beta-6                                                                     | HSPB6_HUMAN | cytoplasm            | 0  | 5   |
| Y | ICAM1            | intercellular adhesion molecule 1                                                             | ICAM1_HUMAN | membrane             | 0  | 50  |
| W | IGHV3-13         | immunoglobulin heavy variable 3-13                                                            | IGHV3-13    | cytoplasm            | 0  | 0   |
| T | IL-1F9           | interleukin-36 gamma                                                                          | IL36G_HUMAN | extracellular region | 0  | 7   |
| ? | ILK              | integrin-linked protein kinase                                                                | ILK_HUMAN   | cytoplasm            | 2  | 43  |
| Y | ITGA3            | integrin alpha-3                                                                              | ITA3_HUMAN  | membrane             | 3  | 18  |
| Y | ITGAV            | integrin alpha-V                                                                              | ITAV_HUMAN  | membrane             | 1  | 29  |
| Y | ITGB1            | integrin beta-1                                                                               | ITB1_HUMAN  | membrane             | 19 | 78  |
| ? | ITIH5            | inter-alpha-trypsin inhibitor heavy chain H5                                                  | ITIH5_HUMAN | cytoplasm            | 0  | 5   |
| T | Lacritin         | extracellular glycoprotein lacritin                                                           | LACRT_HUMAN | extracellular region | 0  | 1   |
| T | LAMA2            | laminin subunit alpha-2                                                                       | LAMA2_HUMAN | extracellular region | 0  | 4   |
| T | LAMA4            | laminin subunit alpha-4                                                                       | LAMA4_HUMAN | extracellular region | 0  | 9   |
| T | LAMA5            | laminin subunit alpha-5                                                                       | LAMA5_HUMAN | extracellular region | 1  | 17  |
| T | LAMB1            | laminin subunit beta-1                                                                        | LAMB1_HUMAN | extracellular region | 0  | 16  |
| T | LAMB2            | laminin subunit beta-2                                                                        | LAMB2_HUMAN | extracellular region | 0  | 9   |
| T | LAMG1            | laminin subunit gamma-1                                                                       | LAMC1_HUMAN | extracellular region | 0  | 18  |
| X | Lipocalin 1      | lipocalin-1                                                                                   | LCN1_HUMAN  | extracellular region | 0  | 1   |
| ? | Lipophilin B     | secretoglobulin family 1D member 2 (Lipophilin-B)                                             | SG1D2_HUMAN | cytoplasm            | 0  | 3   |
| ? | LOXL3            | lysyl oxidase homolog 3                                                                       | LOXL3_HUMAN | cytoplasm            | 0  | 4   |
| Y | LRP1             | prolow-density lipoprotein receptor-related protein 1<br>(clived in: LRP-85, LRP-515, LRPICD) | LRP1_HUMAN  | membrane             | 9  | 57  |
| ? | M6B              | neuronal membrane glycoprotein M6-b                                                           | GPM6B_HUMAN | cytoplasm            | 0  | 5   |
| ? | Maspin           | serpin B5 (maspin)                                                                            | SPB5_HUMAN  | cytoplasm            | 2  | 17  |
| T | MFGE8            | lactadherin (clived in: lactadherin short form, medin                                         | MFGM_HUMAN  | extracellular region | 0  | 12  |
| ? | MTS1 (S100A4)    | protein S100-A4                                                                               | S10A4_HUMAN | cytoplasm            | 2  | 23  |
| ? | NCAM1            | neuronal membrane glycoprotein M6-b                                                           | NCAM1_HUMAN | membrane             | 0  | 25  |



[illegible]

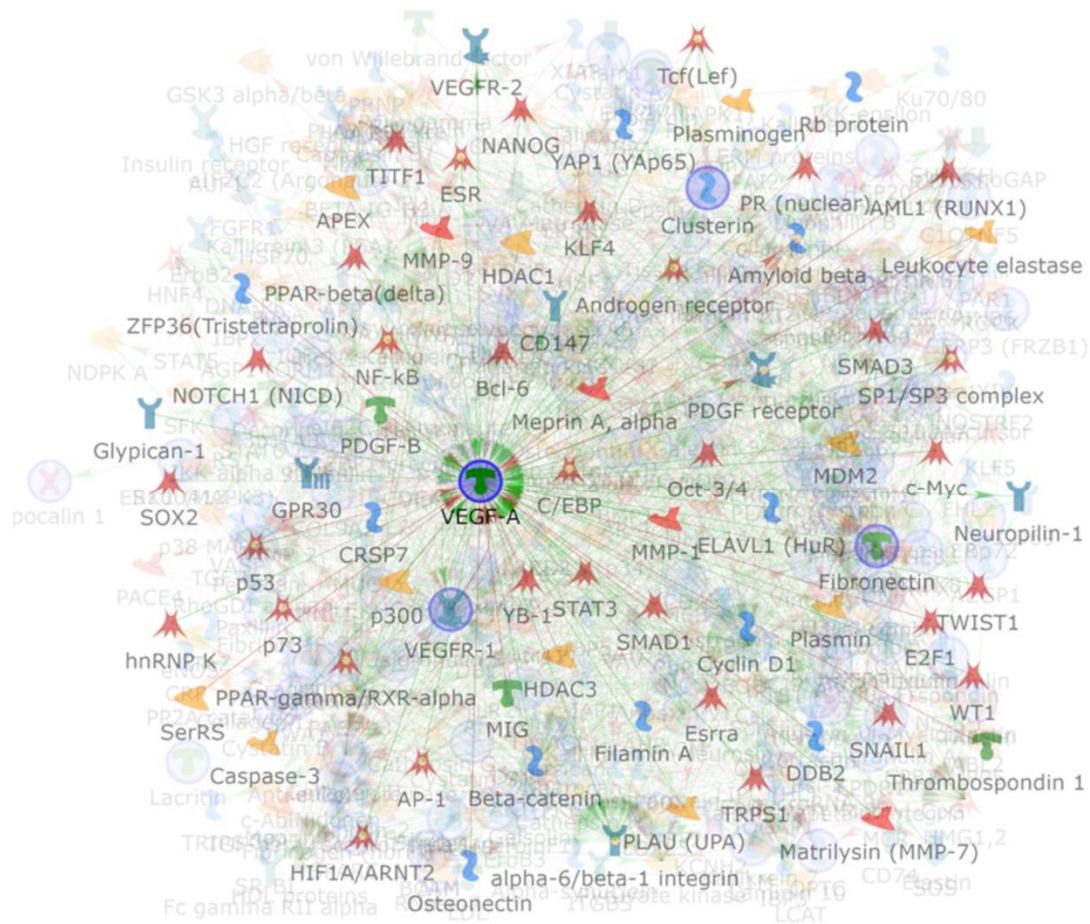

**Figure S1:** Shortest path net, trace mode visualization centred on VEGF-A. Only proteins that directly interact with VEGF-A (in bold) are visible. The rest of the network appears blurred in the background.
